# Supplementary material for: Optimization of Ultrasound-Assisted Extraction and Characterization of the Phenolic Compounds in Rose Distillation Side Streams Using Spectrophotometric Assays and High-Throughput Analytical Techniques
Source: MDPI journal article supplement (doi:10.3390/molecules28217403), 2023-11-02
Supplement: s1 [file s1]

**Table S1.** Total phenolic content of the experimental runs proposed by the Box-Behnken design.

| Experimental run | Ethanol content (% v/v) | Extraction time (minutes) | Solvent/material ratio (mL/g) | US power (%) | TPC (mg GAE/g dry sample) ( $\pm$ stdev)*, N=3 <sup>1</sup> |
|------------------|-------------------------|---------------------------|-------------------------------|--------------|-------------------------------------------------------------|
| 21               | 80                      | 10                        | 40                            | 20           | 73.6( $\pm$ 3.1)                                            |
| 18               | 100                     | 25                        | 20                            | 50           | 9.1( $\pm$ 1.6)                                             |
| 4                | 100                     | 40                        | 40                            | 50           | 24.0( $\pm$ 1.2)                                            |
| 25               | 80                      | 25                        | 40                            | 50           | 141.1( $\pm$ 3.8)                                           |
| 11               | 60                      | 25                        | 40                            | 80           | 140( $\pm$ 18)                                              |
| 6                | 80                      | 25                        | 60                            | 20           | 84.4( $\pm$ 1.4)                                            |
| 13               | 80                      | 10                        | 20                            | 50           | 90.3( $\pm$ 1.8)                                            |
| 14               | 80                      | 40                        | 20                            | 50           | 104.3( $\pm$ 8.9)                                           |
| 9                | 60                      | 25                        | 40                            | 20           | 126.3( $\pm$ 2.0)                                           |
| 22               | 80                      | 40                        | 40                            | 20           | 143( $\pm$ 12)                                              |
| 1                | 60                      | 10                        | 40                            | 50           | 81.5( $\pm$ 7.0)                                            |
| 26               | 80                      | 25                        | 40                            | 50           | 127( $\pm$ 11)                                              |
| 20               | 100                     | 25                        | 60                            | 50           | 13.8( $\pm$ 4.6)                                            |
| 16               | 80                      | 40                        | 60                            | 50           | 143( $\pm$ 22)                                              |
| 17               | 60                      | 25                        | 20                            | 50           | 145( $\pm$ 16)                                              |
| 24               | 80                      | 40                        | 40                            | 80           | 129( $\pm$ 13)                                              |
| 7                | 80                      | 25                        | 20                            | 80           | 114( $\pm$ 17)                                              |
| 8                | 80                      | 25                        | 60                            | 80           | 89( $\pm$ 17)                                               |
| 10               | 100                     | 25                        | 40                            | 20           | 2.8( $\pm$ 1.4)                                             |
| 23               | 80                      | 10                        | 40                            | 80           | 111( $\pm$ 11)                                              |
| 27               | 80                      | 25                        | 40                            | 50           | 141( $\pm$ 12)                                              |
| 12               | 100                     | 25                        | 40                            | 80           | 20.05( $\pm$ 0.78)                                          |
| 15               | 80                      | 10                        | 60                            | 50           | 77( $\pm$ 10)                                               |
| 2                | 100                     | 10                        | 40                            | 50           | 22.5( $\pm$ 1.8)                                            |
| 19               | 60                      | 25                        | 60                            | 50           | 126( $\pm$ 14)                                              |
| 5                | 80                      | 25                        | 20                            | 20           | 101.1( $\pm$ 7.5)                                           |
| 3                | 60                      | 40                        | 40                            | 50           | 145( $\pm$ 7.2)                                             |

\*stdev: standard deviation; <sup>1</sup> number of replicates

**Table S2.** ANOVA table of the applied Box-Behnken design.

| Source                                               | DF    | Adj SS  | Adj MS  | F-Value | p-Value |
|------------------------------------------------------|-------|---------|---------|---------|---------|
| <i>Model</i>                                         | 11    | 58432.6 | 5312.1  | 36.45   | 0.000   |
| <i>Linear terms</i>                                  | 4     | 42868.8 | 10717.2 | 73.53   | 0.000   |
| Ethanol content (%) (A)                              | 1     | 37746.5 | 37746.5 | 258.99  | 0.000   |
| Extraction time (min) (B)                            | 1     | 4610.0  | 4610.0  | 31.63   | 0.000   |
| Solvent/material (mL/g) (C)                          | 1     | 80.9    | 80.9    | 0.56    | 0.468   |
| US power (%) (D)                                     | 1     | 431.3   | 431.3   | 2.96    | 0.106   |
| <i>Square terms</i>                                  | 4     | 13201.0 | 3300.2  | 22.64   | 0.000   |
| Ethanol content (%)*Ethanol content (%) (AA)         | 1     | 13041.4 | 13041.4 | 89.48   | 0.000   |
| Extraction time (min)*Extraction time (min) (BB)     | 1     | 961.7   | 961.7   | 6.60    | 0.021   |
| Solvent/material (mL/g)*Solvent/material (mL/g) (CC) | 1     | 1982.1  | 1982.1  | 13.60   | 0.002   |
| US power (%)*US power (%) (DD)                       | 1     | 1135.5  | 1135.5  | 7.79    | 0.014   |
| <i>2-Way Interaction</i>                             | 3     | 2362.9  | 787.6   | 5.40    | 0.010   |
| Ethanol content (%)*Extraction time (min) (AB)       | 1     | 974.4   | 974.4   | 6.69    | 0.021   |
| Extraction time (min)*Solvent/material (mL/g) (BC)   | 1     | 709.8   | 709.8   | 4.87    | 0.043   |
| Extraction time (min)*US power (%) (BD)              | 1     | 678.6   | 678.6   | 4.66    | 0.048   |
| <i>Error</i>                                         | 15    | 2186.2  | 145.7   |         |         |
| <i>Lack-of-Fit</i>                                   | 13    | 2069.8  | 159.2   | 2.74    | 0.299   |
| <i>Pure Error</i>                                    | 2     | 116.4   | 58.2    |         |         |
| <i>Total</i>                                         | 26    | 60618.8 |         |         |         |
| $R^2$                                                | 0.964 |         |         |         |         |
| $R^2_{adj}$                                          | 0.938 |         |         |         |         |
| $R^2_{pred}$                                         | 0.854 |         |         |         |         |

**Table S3.** Intensities of the phenolic compounds elucidated by LC-MS/MS analysis.

| Phenolic compound     | m/z intensities of the elucidated compounds<br>(cps × 10 <sup>6</sup> ) |          |           |          |
|-----------------------|-------------------------------------------------------------------------|----------|-----------|----------|
|                       | RSB1_BEST                                                               | RSB1_LOW | RSB2_BEST | RSB2_LOW |
|                       |                                                                         | TPC      |           | TPC      |
| Benzoic acid          | 15.47                                                                   | 7.45     | 16.47     | -        |
| Catechin              | -                                                                       | -        | 2.58      | 1.30     |
| Coumaric acid         | 38.68                                                                   | 30.37    | -         | 7.45     |
| Eriodictyol           | -                                                                       | -        | 62.14     | 40.60    |
| Gallic acid           | 1148.94                                                                 | 786.98   | 226.80    | 173.96   |
| Kaempferol            | 1141.20                                                                 | 828.40   | 795.34    | 497.04   |
| Naringenin            | 145.84                                                                  | 117.91   | 124.27    | 156.57   |
| Pyrocatechol          | -                                                                       | -        | 14.60     | -        |
| Protocatehuic acid    | 162.46                                                                  | 6.35     | 18.64     | -        |
| Quercetin             | 1160.54                                                                 | 817.36   | 274.33    | 160.16   |
| Rosmarinic acid       | 15.47                                                                   | 22.09    | 16.47     | -        |
| Syringaldehyde        | -                                                                       | -        | -         | 1.30     |
| p-Hydroxybenzoic acid | 42.55                                                                   | 20.16    | 8.06      | 17.40    |

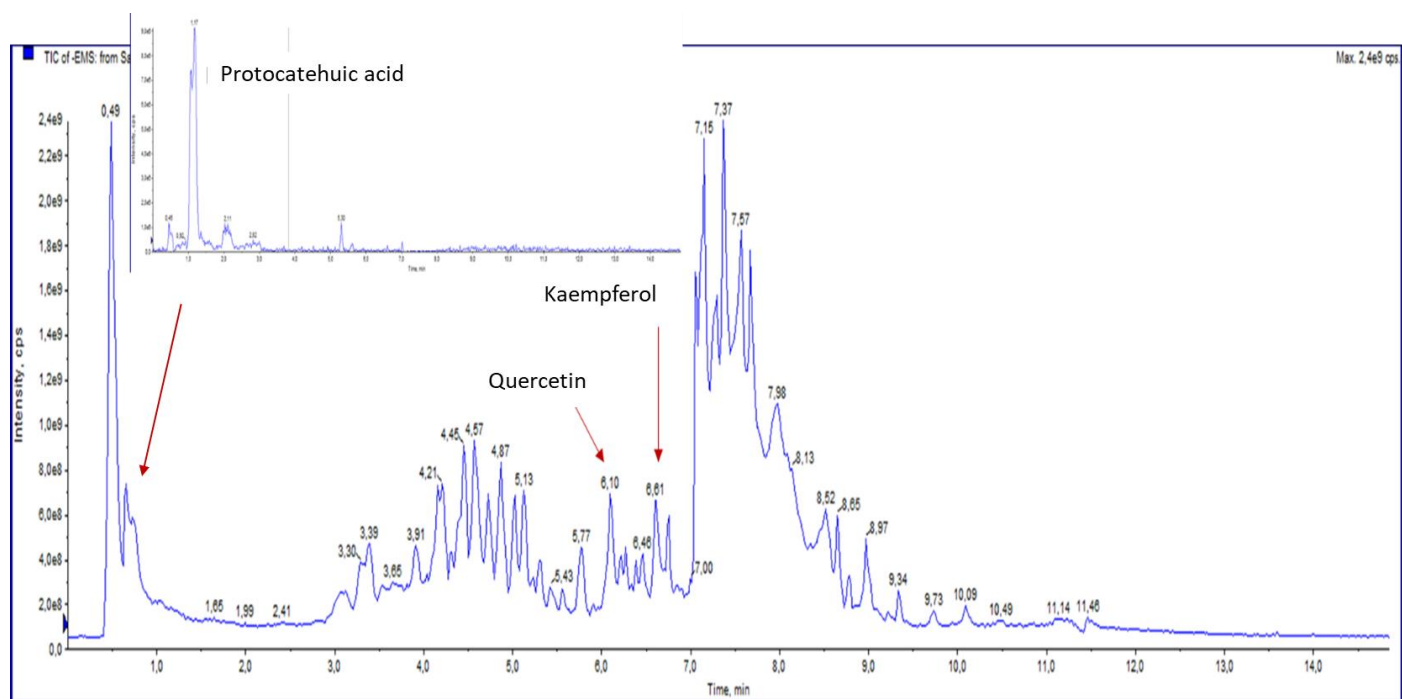

Figure S1. Chromatographs mass spectra of selected identified phenolic compounds.
